# Supplementary material for: Single-cell characterization of step-wise acquisition of carboplatin resistance in ovarian cancer
Source: PubMed Central journal article supplement (PMC9206019; doi:10.1038/s41540-022-00230-z), 2022-06-17
Supplement: 41540_2022_230_MOESM1_ESM.pdf [file 41540_2022_230_MOESM1_ESM.pdf]

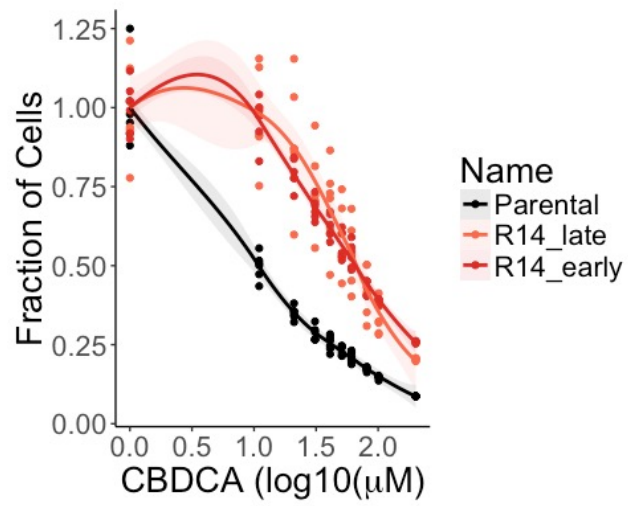

**Supplementary Figure 1:** Dose Response comparing the drug sensitivity of R14 clones after 36 (R14\_early) and 99 (R14\_late) doublings after step 15 selection.

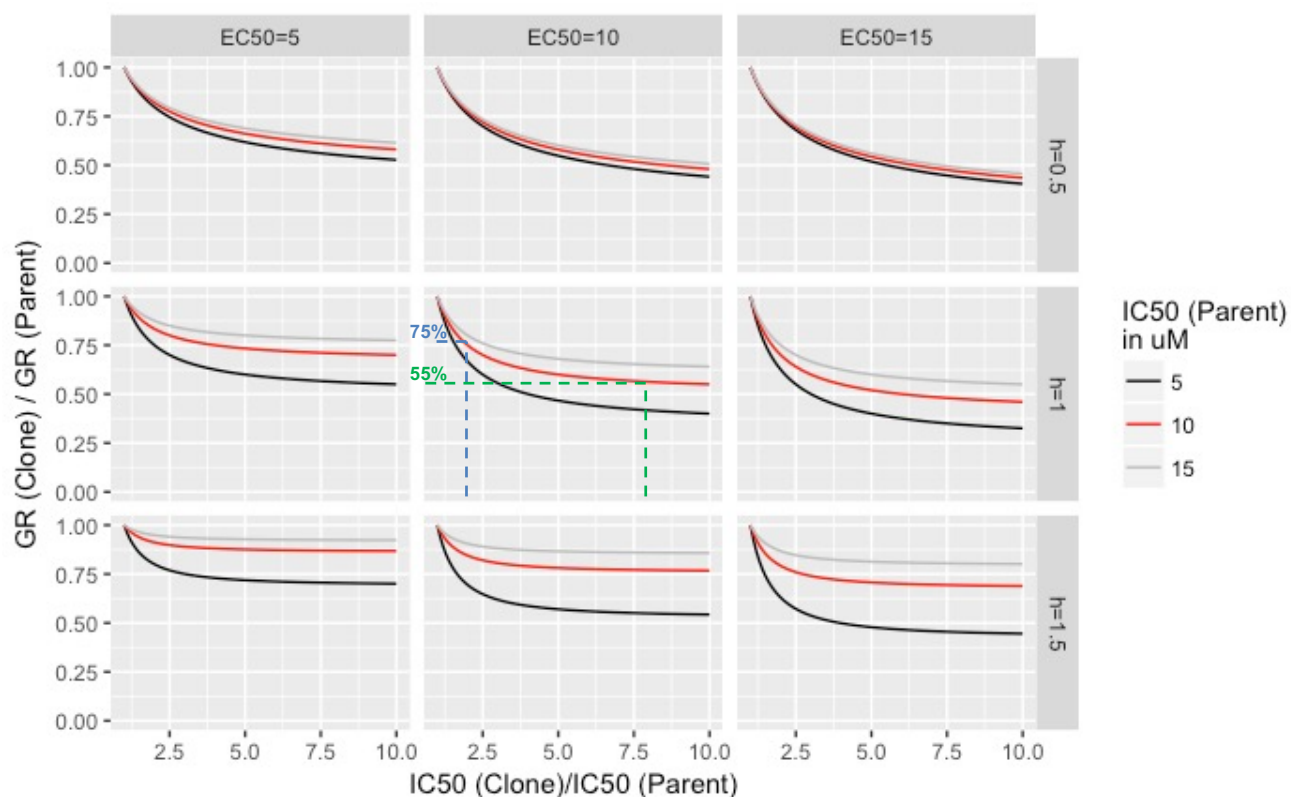

**Supplementary Figure 2: Simulated impact of growth rate on resistance.** The reduction in growth rate (y axis) is associated with an increase in IC50 (x-axis). The simulations were performed according to Hafner et al (formula IC(c,t) located at <http://www.grcalculator.org/grtutorial/>). The IC50 of the parental clone (colored lines), hill coefficient (grid rows) and EC50 (grid columns) were tested around the experimental ones observed (IC50=10  $\mu$ M, h=1, EC50=10  $\mu$ M, middle panel of the grid, red line). The level of resistance observed in step 5 (blue lines) and step 15 (green lines) is indicated.

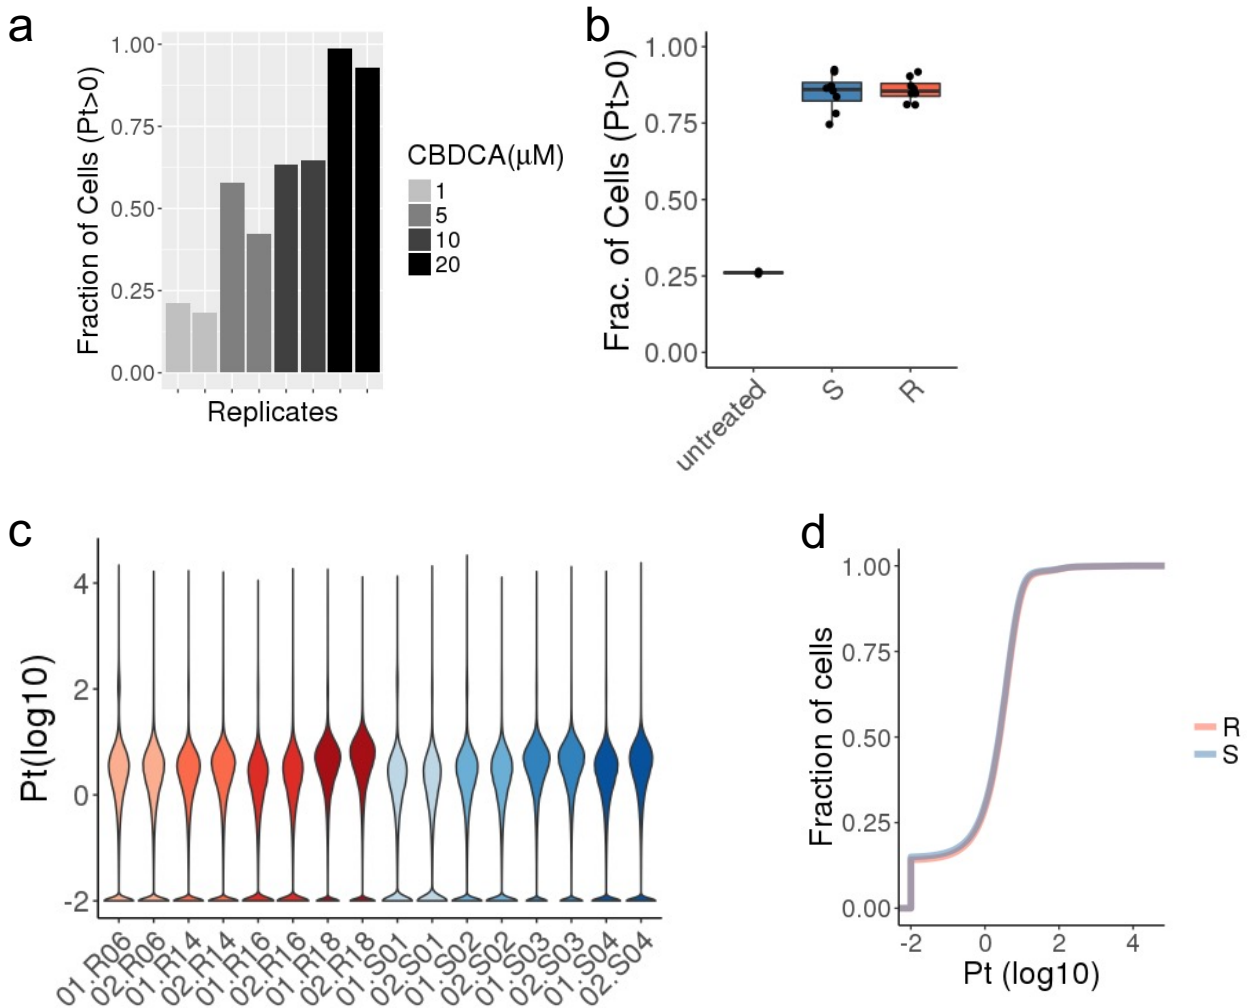

**Supplementary Figure 3: Platinum uptake measured by mass cytometry. (a)** The fraction of cells from the parental clone with detectable Pt content was measured after 1 h treatment with increasing dose of carboplatin (x axis, grey color gradient). **(b)** Fraction of cells with detectable levels of Pt. Each clone (S and step 15 R clones) and replicate are represented. Boxes represent the top and bottom quartiles of the distribution and whiskers are extended to 1.5 times the interquartile range. **(c)** Violin plot showing the distribution of Pt content across cells from all clones and replicates. **(d)** Cumulative distribution of Pt content between cells from S clones and step 5 R clones and replicates. The Pt negative cells were assigned at 0.01 Pt content for graphical representation (C and D).

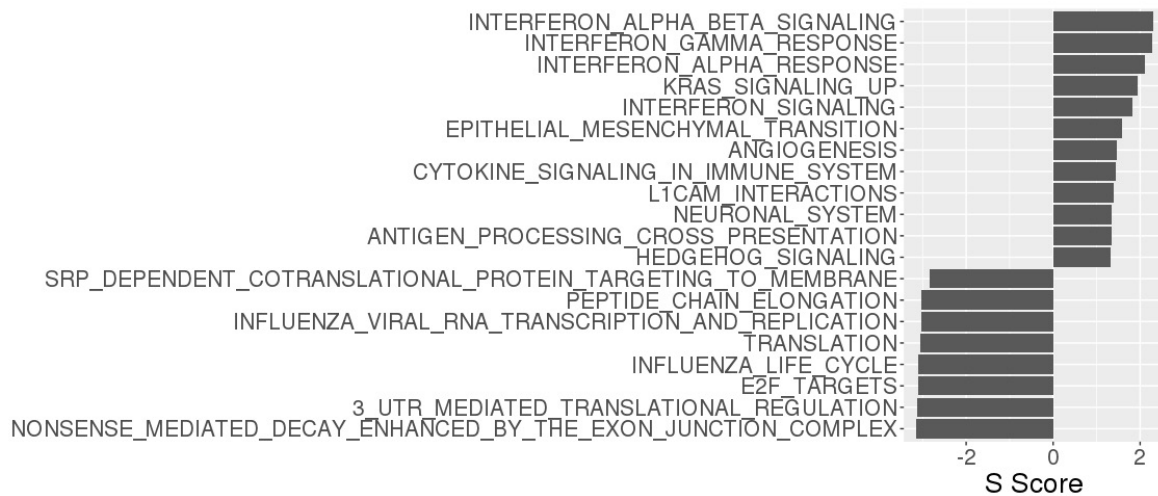

**Supplementary Figure 4: Most affected pathways in the resistant clones.**

Most significantly up or down-regulated processes in CBDCA resistant clones after step 15 selection ( $q.value < 0.05$ ). All Hallmark (N=50) and Reactome (N=674) gene sets from MSigDB were included in the analysis.

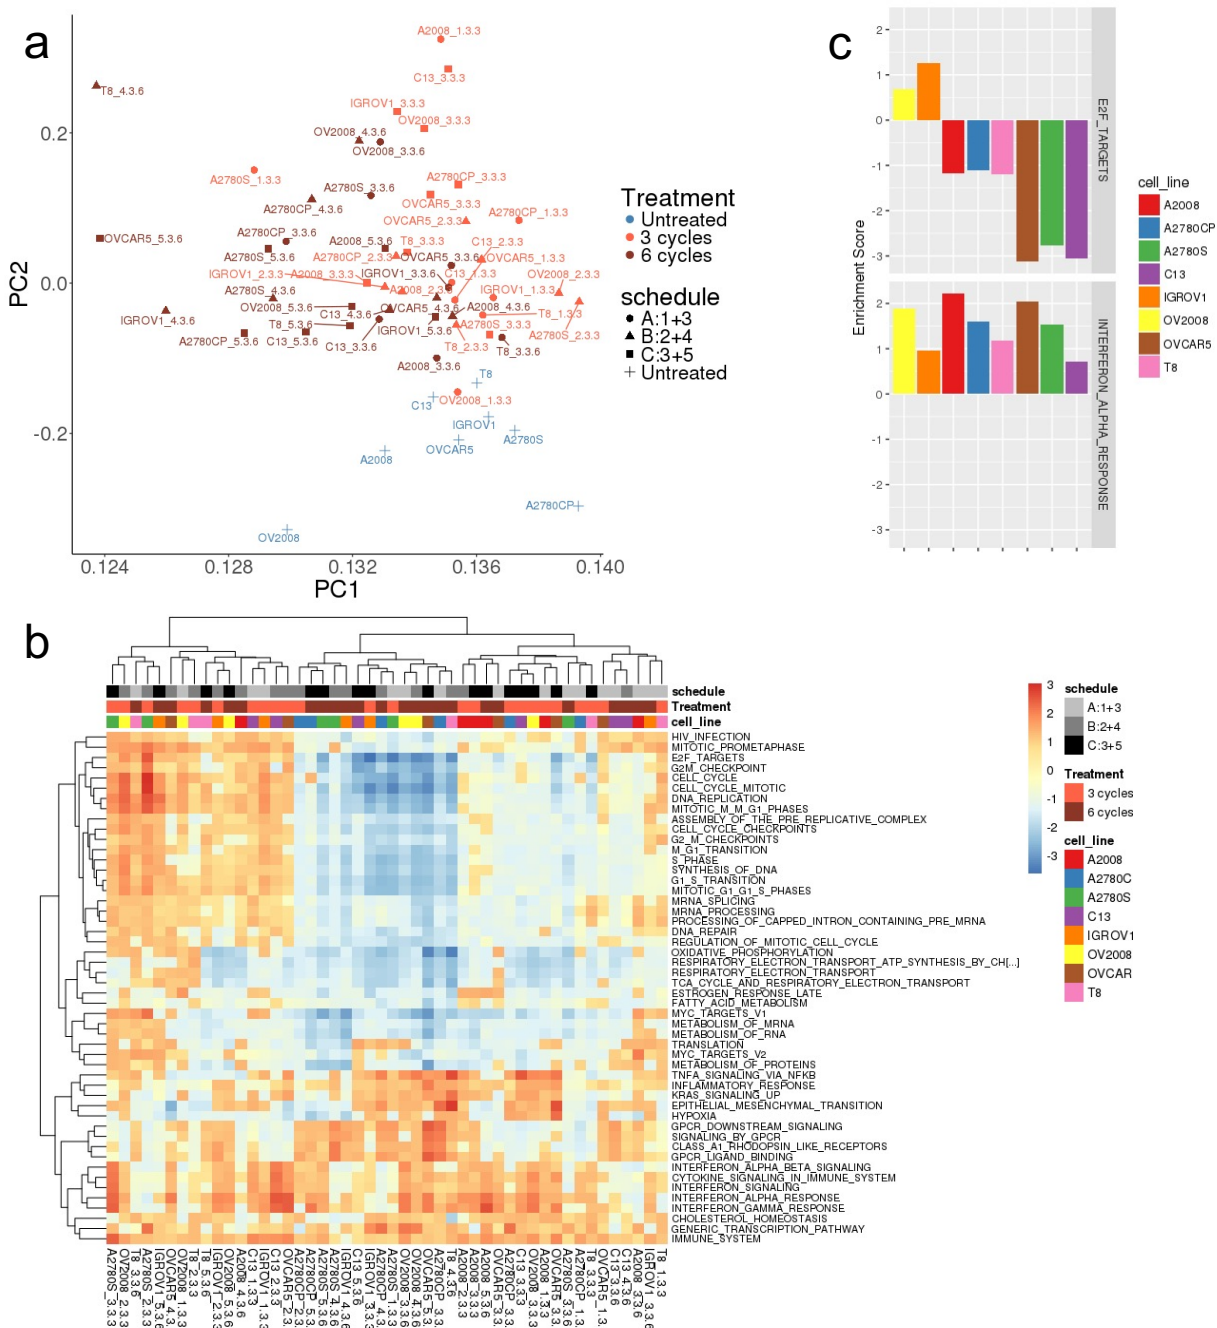

**Supplementary Figure 5: Signatures of acquired cisplatin resistance in 8 ovarian cancer cell lines.**

**(a)** Principal component analysis of 56 samples from 8 cell lines. Resistant lines were derived from each cell line using 3 treatment schedules of 6 cycles each, increasing cisplatin concentration after 3 cycles. Cells were analyzed after 3 and 6 treatment cycles. Cell line specific variance was corrected for batch effect. See Methods and Marchion et al for details **(b)** Fold change in gene set expression levels compared to all untreated samples. In each treated sample and the set of 8 untreated samples was used to calculate the enrichment score of all Hallmarks and Reactome gene sets from MSigDB. Significant gene sets more than 4 fold induced or repressed in at least one sample are represented. The color scale represents the enrichment score (log scale). **(c)** Enrichment score for two representative gene sets for samples after 6 cycles of treatment schedule C (3  $\mu$ M then 5  $\mu$ M)

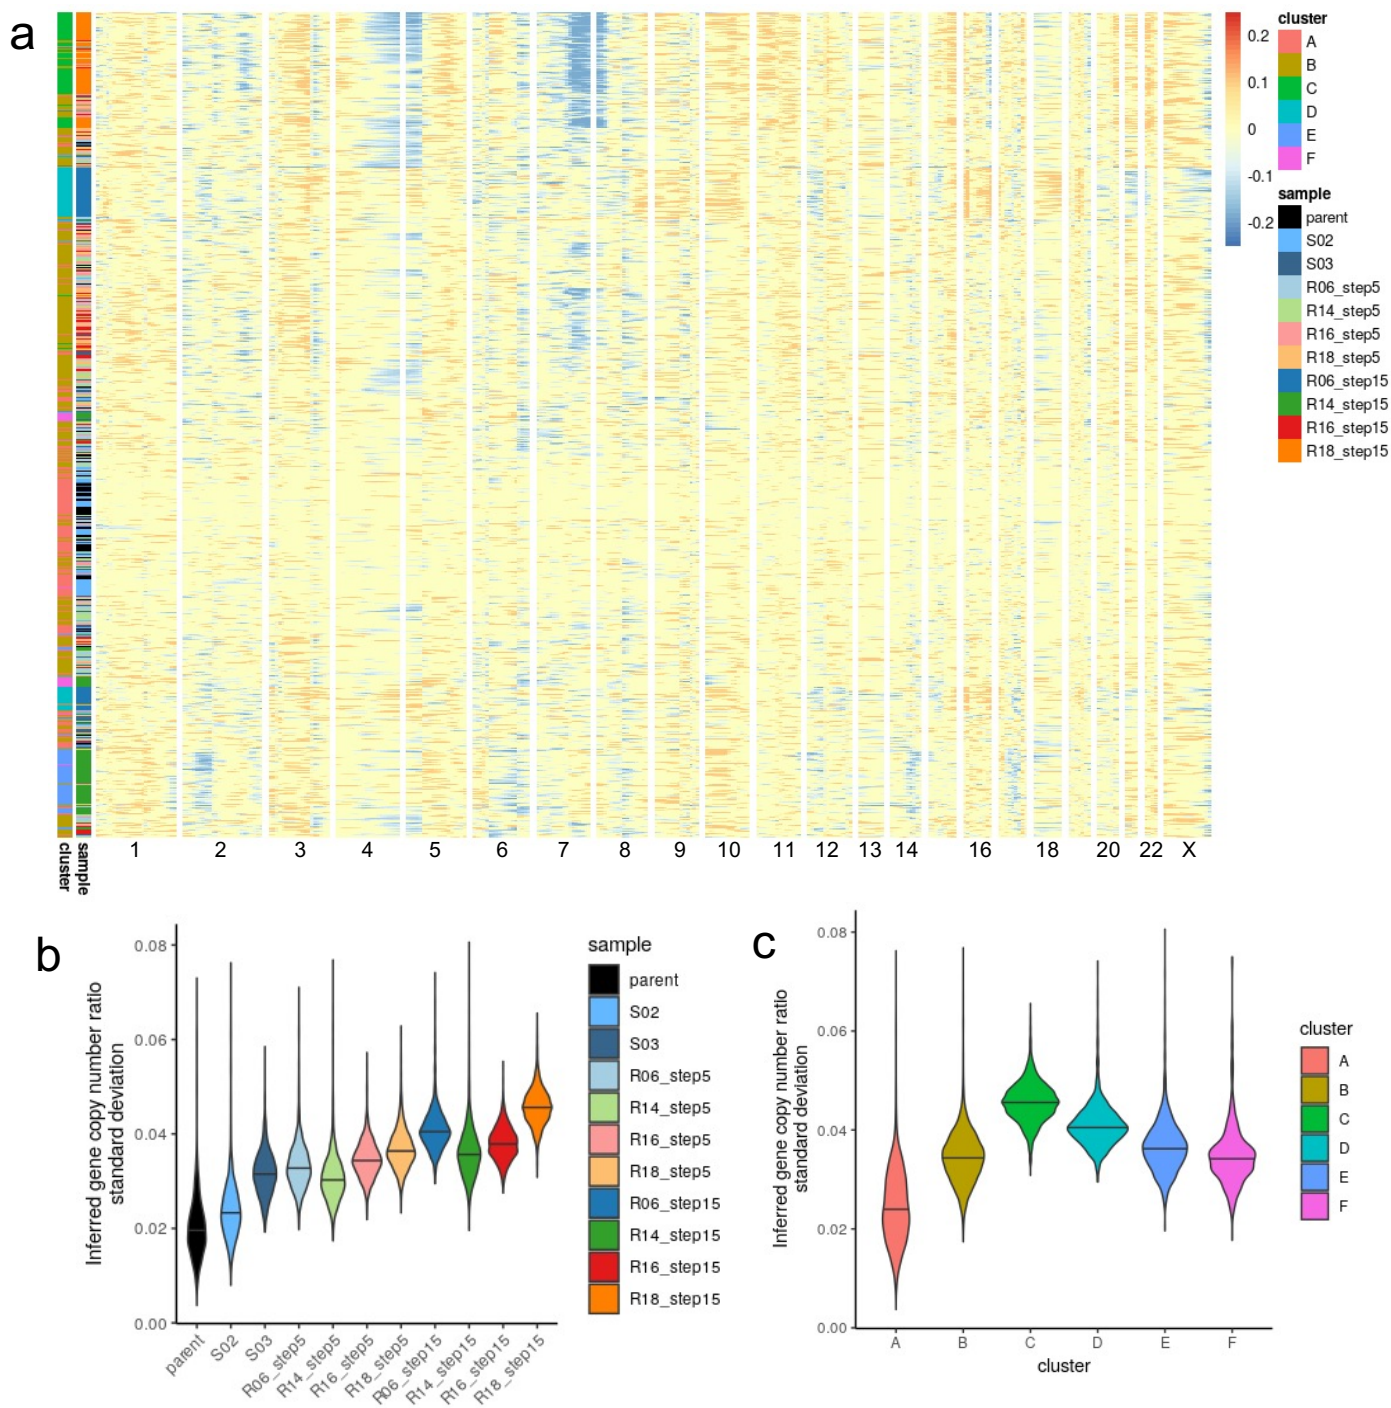

**Supplementary Figure 6: Chromosome Copy Number Profile inferred from scRNA-seq expression.**

(a) clustered heatmap of the copy number ratio observed in individual cells (rows) annotated based on their sample and cluster assignment. Genomic interval bins (columns – 10 Mbp windows) are group by chromosome (grouped columns). Values represent the log<sub>2</sub> of the average copy number. The COAV3 cells were used as reference group. (b-c) Distribution of the standard deviation in gene copy number ratio for all cells in each sample (B) or expression-based cluster (C)

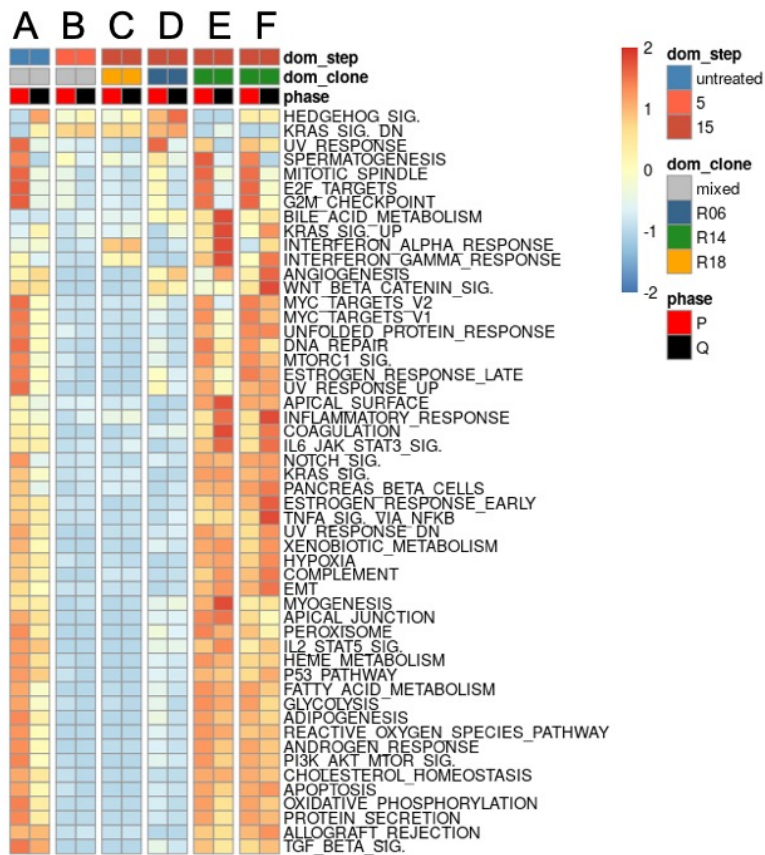

**Supplementary Figure 7: Clustered heatmap** representing the median gene set enrichment scores (z-score - color-scale) for hallmark gene sets (rows) for all clusters in proliferative (P) or quiescence (Q) phases. Dominant treatment step (dom\_step) and clone (dom\_clone) in each cluster are indicated.

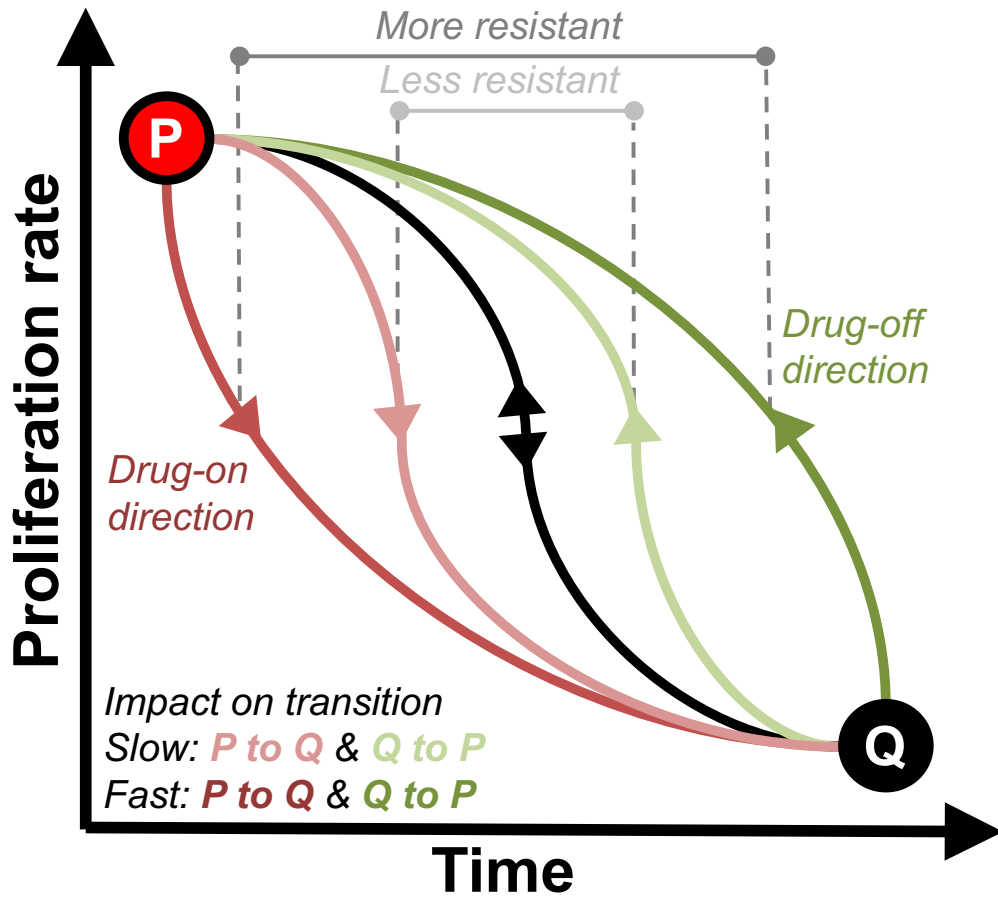

**Supplementary Figure 8: A hysteresis model of resistance.** Transition between proliferation (P) and quiescence (Q) occurs at each treatment cycle following directional transitions on the hysteresis diagram: drug-on (red, downward paths) and drug-off (green upward paths) transitions. The functional state of the cells in P and Q, different after each cycle, impacts the effectiveness of the transition: light colors and low time-wise slope: slow path, dark color and steep time-wise slope: fast path.



Supplementary Table 1: Copy Number Segments called by CODEX.

| Clone | CNV type | chromosome | start     | stop      | length (kb) | N exons | total | expected | coverage ratio | log | Genes                                                               |
|-------|----------|------------|-----------|-----------|-------------|---------|-------|----------|----------------|-----|---------------------------------------------------------------------|
| S01   | gain     | chr10      | 225903    | 1437130   | 1211        | 126     | 9232  | 7194     | 0.36           | 265 | ADARB2;DIP2C;GTPBP4;ID1;ID2;LARP4B;PRR26;WDR37;ZMYND11              |
| S02   | loss     | chr20      | 14066262  | 16721182  | 2655        | 51      | 3810  | 4558     | -0.26          | 65  | FLRT3;KIF16B;MACROD2;SNRPB2                                         |
| S02   | loss     | chr20      | 16721569  | 20033488  | 3312        | 199     | 19542 | 23335    | -0.26          | 327 | BANF2;BFSP1;CFAP61;CRNKL1;DSTN;DTD1;DZANK1;KAT14;LINC00493;MGME1;   |
| S02   | loss     | chr20      | 20066006  | 21106921  | 1041        | 67      | 5491  | 6733     | -0.29          | 122 | CFAP61;INSM1;KIZ;RALGAP2                                            |
| S02   | loss     | chr20      | 21126138  | 25484748  | 4359        | 199     | 14578 | 19389    | -0.41          | 654 | ABHD12;ACSS1;APMAP;CD93;CST1;CST11;CST2;CST3;CST4;CST5;CST7;CST8;   |
| S02   | loss     | chr20      | 25485593  | 25667185  | 182         | 12      | 892   | 1099     | -0.30          | 21  | NANP;NINL;ZNF337                                                    |
| S01   | loss     | chr8       | 48114083  | 48586432  | 472         | 13      | 1859  | 2239     | -0.27          | 34  | SPIDR                                                               |
| R06   | loss     | chr5       | 58120901  | 58287838  | 167         | 9       | 1193  | 1440     | -0.27          | 23  | PDE4D;RAB3C                                                         |
| S01   | gain     | chr13      | 78320681  | 80911885  | 2591        | 52      | 6192  | 4542     | 0.45           | 269 | EDNRB;NDFIP2;POU4F1;RBM26;RNF219;SLAIN1;SPRY2                       |
| S01   | loss     | chr13      | 101707560 | 102235705 | 528         | 46      | 2332  | 3125     | -0.42          | 110 | ITGBL1;NALCN                                                        |
| R16   | gain     | chr2       | 128335747 | 131878635 | 3543        | 199     | 36682 | 31619    | 0.21           | 385 | AC013269.5;AMER3;AMMECR1L;ARHGEF4;CCDC115;CCDC74B;CFC1;CFC1B;F      |
| S03   | loss     | chr7       | 151946959 | 152143463 | 197         | 15      | 590   | 872      | -0.56          | 52  | KMT2C                                                               |
| R16   | gain     | chr2       | 185463620 | 190044473 | 4581        | 199     | 13613 | 10963    | 0.31           | 297 | CALCRL;COL3A1;COL5A2;DIRC1;FAM171B;FSIP2;GULP1;ITGAV;TFPI;ZC3H15;ZN |
| R16   | gain     | chr2       | 190334092 | 192275992 | 1942        | 198     | 20371 | 16816    | 0.28           | 352 | ANKAR;ASNSD1;C2orf88;GLS;HIBCH;INPP1;MFSD6;MSTN;MYO1B;NAB1;NEMP2;   |
| R16   | gain     | chr2       | 192280781 | 192711733 | 431         | 10      | 1572  | 1288     | 0.29           | 29  | MYO1B;NABP1;SDPR                                                    |
| S03   | loss     | chr2       | 196544782 | 196681657 | 137         | 23      | 1877  | 2454     | -0.39          | 74  | DNAH7;SLC39A10                                                      |
| S03   | loss     | chr2       | 196682401 | 198267809 | 1585        | 199     | 13365 | 17234    | -0.37          | 471 | ANKRD44;BOLL;C2orf66;CCDC150;COQ10B;DNAH7;GTF3C3;HECW2;HSPD1;HS     |
| R06   | loss     | chr2       | 197208349 | 198670120 | 1462        | 179     | 14338 | 18703    | -0.38          | 555 | PE1;HSPE1-MOB4;MARS2;MOB4;PGAP1;PLCL1;RFTN2;SF3B1;STK17B            |
| S03   | loss     | chr2       | 198273032 | 199011808 | 739         | 61      | 4454  | 5640     | -0.34          | 135 |                                                                     |
| R18   | loss     | chr2       | 205550863 | 206058020 | 507         | 12      | 452   | 652      | -0.53          | 34  |                                                                     |
| R19   | loss     | chr2       | 205829848 | 206058020 | 228         | 11      | 380   | 572      | -0.59          | 37  | PARD3B                                                              |

Supplementary Table 2: List novel coding mutations not shared between all clones

| Gene     | Transcript mutation  | Protein mutation | Type                       | N positive clones |           | Fisher Pvalue | Description                            | Canonical Pathway                | GO Biological Processes                          |
|----------|----------------------|------------------|----------------------------|-------------------|-----------|---------------|----------------------------------------|----------------------------------|--------------------------------------------------|
|          |                      |                  |                            | Resistant         | Sensitive |               |                                        |                                  |                                                  |
| ACAP3    | c.194G               | p.C32G           | nonsynonymous SNV          | 5                 | 0         | 0.26          | ArfGAP with GTPase domain, ankyrin     |                                  | GO:0043547 positive regulation of GTPase         |
| CAAP1    | c.A307C              | p.T103P          | nonsynonymous SNV          | 8                 | 1         | 0.34          | caspase activity and apoptosis         |                                  | GO:0006915 apoptotic process;GO:0012501          |
| FAM178B  | c.C40T               | p.P14S           | nonsynonymous SNV          | 0                 | 1         | 0.38          | family with sequence similarity 178    |                                  |                                                  |
| KAT6A    | c.C5738A             | p.S1913Y         | nonsynonymous SNV          | 0                 | 1         | 0.38          | lysine acetyltransferase 6A            |                                  | GO:0043966 histone H3                            |
| OAT      | c.G418T              | p.V140F          | nonsynonymous SNV          | 0                 | 1         | 0.38          | ornithine aminotransferase             |                                  | GO:0055129 L-proline biosynthetic                |
| PCDH17   | c.C2453A             | p.P818Q          | nonsynonymous SNV          | 0                 | 1         | 0.38          | protocadherin 17                       |                                  | GO:1904071 presynaptic active zone               |
| SIGLEC5  | c.C857A              | p.P286H          | nonsynonymous SNV          | 0                 | 1         | 0.38          | sialic acid binding Ig like lectin 5   |                                  | GO:0043312 neutrophil                            |
| SVIL     | c.G2355T             | p.K785N          | nonsynonymous SNV          | 0                 | 1         | 0.38          | supervillin                            | (M58)PID AR PATHWAY              | GO:0032467 positive regulation of                |
| TLR5     | c.C2287A             | p.L763I          | nonsynonymous SNV          | 0                 | 1         | 0.38          | tolll like receptor 5                  |                                  | GO:0034146 toll-like receptor 5 signaling        |
| C2orf72  | c.C364G              | p.R122G          | nonsynonymous SNV          | 2                 | 2         | 0.60          | chromosome 2 open reading frame        |                                  |                                                  |
| LONRF1   | c.C958A              | p.Q320K          | nonsynonymous SNV          | 7                 | 2         | 0.66          | LON peptidase N-terminal domain        |                                  | GO:0032436 positive regulation of proteasomal    |
| A2M      | c.C1746G             | p.H582Q          | nonsynonymous SNV          | 8                 | 3         | 1.00          | alpha-2-macroglobulin                  | (M183)PID IL6 7 PATHWAY;         | GO:0001869 negative regulation of complement     |
| ACAN     | c.A1106G             | p.D369G          | nonsynonymous SNV          | 1                 | 0         | 1.00          | aggregran                              | (M5882)NABA PROTEOGLYCANS;       | GO:0042340 keratan sulfate catabolic             |
| ARX      | c.C539T              | p.A180V          | nonsynonymous SNV          | 8                 | 3         | 1.00          | aristalless related homeobox           |                                  | GO:0021831 embryonic olfactory bulb              |
| ATXN7L1  | c.C969A              | p.D323E          | nonsynonymous SNV          | 8                 | 3         | 1.00          | ataxin 7 like 1                        |                                  |                                                  |
| CACNA1E  | c.C5806A             | p.P1936T         | nonsynonymous SNV          | 8                 | 3         | 1.00          | calcium voltage-gated channel          |                                  | GO:0050796 regulation of insulin                 |
| CBFA2T3  | c.C1829T             | p.P610L          | nonsynonymous SNV          | 6                 | 3         | 1.00          | CBFA2/RUNX1 translocation partner      | (M13)PID ERBB4 PATHWAY           | GO:0045820 negative regulation of glycolytic     |
| CCER1    | c.A896G              | p.E299G          | nonsynonymous SNV          | 1                 | 0         | 1.00          | coiled-coil glutamate rich protein 1   |                                  |                                                  |
| CILP2    | c.G2648T             | p.S883I          | nonsynonymous SNV          | 1                 | 0         | 1.00          | cartilage intermediate layer protein 2 | (M3008)NABA ECM                  |                                                  |
| CSMD1    | c.C2270A             | p.P757Q          | nonsynonymous SNV          | 5                 | 2         | 1.00          | CUB and Sushi multiple domains 1       |                                  |                                                  |
| DARS     | c.A1451G             | p.H484R          | nonsynonymous SNV          | 7                 | 4         | 1.00          | aspartyl-tRNA synthetase               |                                  | GO:0006422 aspartyl-tRNA                         |
| EFCAB5   | c.C1513T             | p.P505S          | nonsynonymous SNV          | 3                 | 2         | 1.00          | EF-hand calcium binding domain 5       |                                  |                                                  |
| ELAC2    | c.A373C              | p.I125L          | nonsynonymous SNV          | 1                 | 0         | 1.00          | alaC ribonuclease Z2                   |                                  | GO:0072684 mitochondrial tRNA 3'-trailer         |
| ERH1     | c.C908T              | p.A303V          | nonsynonymous SNV          | 8                 | 3         | 1.00          | exoribonuclease 1                      |                                  | GO:0071044 histone mRNA catabolic                |
| FBN1     | c.C2501A             | p.S834Y          | nonsynonymous SNV          | 1                 | 0         | 1.00          | fibrillin 1                            | (M212)PID INTEGRIN5 PATHWAY;     | GO:2001205 negative regulation of osteoclast     |
| FNDC1    | c.A1882G             | p.D561T          | nonsynonymous SNV          | 3                 | 1         | 1.00          | fibronectin type III domain containing | (M3008)NABA ECM                  |                                                  |
| FRG2C    | c.129_130del         | p.K43fs          | frameshift deletion        | 8                 | 3         | 1.00          | FSDH region gene 2 family member       |                                  |                                                  |
| FRG2C    | c.31_36TAGTGC        | NA               | nonframeshift substitution | 4                 | 2         | 1.00          |                                        |                                  |                                                  |
| FSTL4    | c.G1082A             | p.R361K          | nonsynonymous SNV          | 7                 | 4         | 1.00          | folistatin like 4                      |                                  | GO:0048671 negative regulation of collateral     |
| FUT5     | c.C582G              | p.H194Q          | nonsynonymous SNV          | 8                 | 3         | 1.00          | fucosyltransferase 5                   |                                  | GO:0042355 L-fucose catabolic                    |
| GDF7     | c.124_125insGGCGGG   | p.G42delinsGRR   | nonframeshift insertion    | 0                 | 1         | 1.00          | growth differentiation factor 7        | (M5883)NABA SECRETED FACTORS;    | GO:2001051 positive regulation of tendon cell    |
| GRIN2C   | c.G1463C             | p.R488P          | nonsynonymous SNV          | 4                 | 3         | 1.00          | glutamate ionotropic receptor NMDA     |                                  | GO:0098976 excitatory chemical synaptic          |
| HLA-DRB5 | c.169_181GAGAGACTTCC | NA               | nonframeshift substitution | 6                 | 3         | 1.00          | major histocompatibility complex,      |                                  | GO:0031295 T cell costimulation;GO:0050852 T     |
| HSPB9    | c.G442C              | p.G148R          | nonsynonymous SNV          | 1                 | 0         | 1.00          | heat shock protein family B (small)    |                                  |                                                  |
| HYAL3    | c.T185C              | p.L62P           | nonsynonymous SNV          | 2                 | 0         | 1.00          | hyaluronoglucosaminidase 3             | (M3468)NABA ECM REGULATORS;      | GO:2000355 negative regulation of ovarian        |
| KAT6B    | c.G3739C             | p.V1247L         | nonsynonymous SNV          | 8                 | 3         | 1.00          | lysine acetyltransferase 6B            |                                  | GO:0043966 histone H3                            |
| KLHL1    | c.G1837T             | p.D613Y          | nonsynonymous SNV          | 1                 | 0         | 1.00          | kelch like family member 1             |                                  | GO:0021680 cerebellar Purkinje cell layer        |
| LILRB3   | c.1677_1681TTCCC     | LILRB3           | nonframeshift substitution | 2                 | 0         | 1.00          | leukocyte immunoglobulin like          |                                  | GO:0045671 negative regulation of osteoclast     |
| LOXL4    | c.C1602G             | p.D534E          | nonsynonymous SNV          | 7                 | 3         | 1.00          | lysyl oxidase like 4                   | (M3468)NABA ECM REGULATORS;      | GO:0006898 receptor-mediated                     |
| LRRC19   | c.C71A               | p.S24Y           | nonsynonymous SNV          | 6                 | 3         | 1.00          | leucine rich repeat containing 19      |                                  | GO:0046426 negative regulation of JAK-STAT       |
| LRRC75B  | c.G41C               | p.G14A           | nonsynonymous SNV          | 7                 | 4         | 1.00          | leucine rich repeat containing 75B     |                                  |                                                  |
| MAGEC1   | c.755_757CCC         | NA               | nonframeshift substitution | 5                 | 3         | 1.00          | MAGE family member C1                  |                                  |                                                  |
| MED14    | c.G713T              | p.G238V          | nonsynonymous SNV          | 1                 | 0         | 1.00          | mediator complex subunit 14            |                                  | GO:0030521 androgen receptor signaling           |
| MN1      | c.C1840G             | p.R614G          | nonsynonymous SNV          | 7                 | 4         | 1.00          | MN1 proto-oncogene, transcriptional    |                                  | GO:0001957 intramembranous                       |
| MYH15    | c.C5212G             | p.Q1738E         | nonsynonymous SNV          | 7                 | 3         | 1.00          | myosin heavy chain 15                  |                                  | GO:0002074 extraocular skeletal muscle           |
| NCAPD2   | c.A3527G             | p.D1176G         | nonsynonymous SNV          | 6                 | 4         | 1.00          | non-SMC condensin I complex            | (M14)PID AURORA B PATHWAY        | GO:0010032 meiotic chromosome                    |
| NGEF     | c.A1G                | p.M1V            | nonsynonymous SNV          | 2                 | 0         | 1.00          | neuronal guanine nucleotide            | (M83)PID CDC42 REG PATHWAY;      | GO:0061002 negative regulation of dendritic      |
| NMUR2    | c.C368A              | p.T123K          | nonsynonymous SNV          | 1                 | 0         | 1.00          | neuromedin U receptor 2                |                                  | GO:0043006 activation of phospholipase A2        |
| NOS2     | c.T113C              | p.W5R            | nonsynonymous SNV          | 4                 | 1         | 1.00          | nitric oxide synthase 2                | (M118)PID INTEGRIN A9B1          | GO:0031284 positive regulation of quanylate      |
| NTRK3    | c.C279G              | p.N93K           | nonsynonymous SNV          | 8                 | 3         | 1.00          | neurotrophic receptor tyrosine kinase  | (M100)PID SHP2 PATHWAY;          | GO:0019056 modulation by virus of host           |
| ODF3     | c.C53A               | p.P18H           | nonsynonymous SNV          | 8                 | 3         | 1.00          | outer dense fiber of sperm tails 3     |                                  | GO:0007283 spermatogenesis;GO:0048232            |
| OTUD7A   | c.G889T              | p.D297Y          | nonsynonymous SNV          | 2                 | 0         | 1.00          | OTU deubiquitinase 7A                  |                                  | GO:0071947 protein deubiquitination involved in  |
| PAM      | c.G2220T             | p.L740F          | nonsynonymous SNV          | 6                 | 4         | 1.00          | peptidylglycine alpha-amidating        |                                  | GO:0001519 peptide amidation;GO:0018032          |
| PCDH8    | c.A383G              | p.N128S          | nonsynonymous SNV          | 8                 | 3         | 1.00          | protocadherin beta 8                   |                                  | GO:0007156 homophilic cell adhesion via          |
| PHOX2A   | c.C763G              | p.Q255E          | nonsynonymous SNV          | 7                 | 3         | 1.00          | paired like homeobox 2a                |                                  | GO:0021623 oculomotor nerve                      |
| Piwi1    | c.G2044T             | p.A682S          | nonsynonymous SNV          | 2                 | 0         | 1.00          | piwi like RNA-mediated gene            |                                  | GO:0035093 spermatogenesis, exchange of          |
| PLEKH1   | c.T1216A             | p.C406S          | nonsynonymous SNV          | 7                 | 3         | 1.00          | pleckstrin homology and coiled-coil    |                                  |                                                  |
| PRAG1    | c.3496_3497insCGCCCC | p.P1166delinsPPP | nonframeshift insertion    | 2                 | 1         | 1.00          | PEAK1 related, kinase-activating       |                                  | GO:0018108 peptidyl-tyrosine                     |
| RAE1E    | c.T22C               | p.S8P            | nonsynonymous SNV          | 7                 | 4         | 1.00          | retinoic acid early transcript 1E      |                                  | GO:0045954 positive regulation of natural killer |
| RNF17    | c.G595T              | p.A199S          | nonsynonymous SNV          | 1                 | 1         | 1.00          | ring finger protein 17                 |                                  | GO:0007286 spermatid                             |
| ROBO1    | c.T2612A             | p.L871Q          | nonsynonymous SNV          | 2                 | 0         | 1.00          | roundabout guidance receptor 1         | (M142)PID AJDISS 2PATHWAY        | GO:0021836 chemorepulsion involved in            |
| RPTN     | c.G2303C             | p.R768P          | nonsynonymous SNV          | 2                 | 0         | 1.00          | repletin                               | (M5883)NABA SECRETED FACTORS;    | GO:0070268 cornification;GO:0031424              |
| RSPO2    | c.T329C              | p.V110A          | nonsynonymous SNV          | 8                 | 3         | 1.00          | R-spondin 2                            | (M3008)NABA ECM                  | GO:0042489 negative regulation of                |
| SALL4    | c.C380T              | p.P127L          | nonsynonymous SNV          | 7                 | 4         | 1.00          | spalt like transcription factor 4      | (M223)PID BETA CATENIN NUC       | GO:0001833 inner cell mass cell                  |
| SLC15A5  | c.T97C               | p.S33P           | nonsynonymous SNV          | 8                 | 3         | 1.00          | solute carrier family 15 member 5      |                                  | GO:0015031 protein transport;GO:0015833          |
| SLC37A2  | c.A790C              | p.I264L          | nonsynonymous SNV          | 8                 | 3         | 1.00          | solute carrier family 37 member 2      |                                  | GO:0015760 glucose-6-phosphate                   |
| SLC6A6   | c.C1248A             | p.Y416X          | stopgain                   | 1                 | 0         | 1.00          | solute carrier family 6 member 6       |                                  | GO:0015734 laurine transport;GO:0042908          |
| SQSTM1   | c.G922C              | p.A308P          | nonsynonymous SNV          | 7                 | 3         | 1.00          | sequestosome 1                         | (M110)PID IL1 PATHWAY; (M128)PID | GO:1900273 positive regulation of long-term      |
| TBC1D22A | c.G190T              | p.A64S           | nonsynonymous SNV          | 7                 | 4         | 1.00          | TBC1 domain family member 22A          |                                  | GO:1902017 regulation of cilium                  |

|         |           |          |                      |   |   |      |                                       |                            |                                              |
|---------|-----------|----------|----------------------|---|---|------|---------------------------------------|----------------------------|----------------------------------------------|
| TH      | c.A302T   | p.K101M  | nonsynonymous SNV    | 1 | 0 | 1.00 | tyrosine hydroxylase                  | (M199)PID P38 MK2 PATHWAY; | GO:0006585 dopamine biosynthetic process     |
| THEMIS2 | c.A227G   | p.N76S   | nonsynonymous SNV    | 1 | 0 | 1.00 | thymocyte selection associated family |                            | GO:0050852 T cell receptor signaling         |
| TSPAN16 | c.692dupG | p.W231fs | frameshift insertion | 6 | 4 | 1.00 | tetraspanin 16                        |                            | GO:0007166 cell surface receptor signaling   |
| WDHD1   | c.C2359T  | p.R787X  | stopgain             | 7 | 4 | 1.00 | WD repeat and HMG-box DNA             |                            | GO:0070829 heterochromatin                   |
| ZFC3H1  | c.A2531G  | p.E844G  | nonsynonymous SNV    | 7 | 3 | 1.00 | zinc finger C3H1-type containing      |                            | GO:0006396 RNA processing;GO:0016070 RNA     |
| ZNF615  | c.A767G   | p.Q256R  | nonsynonymous SNV    | 1 | 0 | 1.00 | zinc finger protein 615               |                            | GO:0006355 regulation of transcription, DNA- |

**Supplementary Table 3: Single cell Pt content measured by Mass Cytometry**

| Clone | Replicate | N cells | N cells with Pt>0 | log10(Pt) |      |            |
|-------|-----------|---------|-------------------|-----------|------|------------|
|       |           |         |                   | Mean      | SD   | Group Mean |
| R06   | 1         | 182799  | 154826            | 0.452     | 0.66 | 0.434      |
| R06   | 2         | 187925  | 159176            | 0.375     | 0.54 |            |
| R14   | 1         | 187341  | 161575            | 0.382     | 0.56 |            |
| R14   | 2         | 188674  | 164508            | 0.426     | 0.54 |            |
| R16   | 1         | 188941  | 152997            | 0.285     | 0.58 |            |
| R16   | 2         | 187402  | 151930            | 0.326     | 0.56 |            |
| R18   | 1         | 182658  | 167601            | 0.571     | 0.55 |            |
| R18   | 2         | 190496  | 172071            | 0.626     | 0.51 |            |
| S01   | 1         | 187139  | 146254            | 0.308     | 0.61 | 0.413      |
| S01   | 2         | 183219  | 136607            | 0.282     | 0.62 |            |
| S02   | 1         | 184307  | 157657            | 0.377     | 0.60 |            |
| S02   | 2         | 186620  | 156035            | 0.338     | 0.55 |            |
| S03   | 1         | 189050  | 174895            | 0.535     | 0.52 |            |
| S03   | 2         | 189303  | 173739            | 0.540     | 0.51 |            |
| S04   | 1         | 189552  | 165198            | 0.372     | 0.54 |            |
| S04   | 2         | 194450  | 168067            | 0.495     | 0.52 |            |

**Supplementary Table 4: Exome sequencing summary statistics**

| <b>Clone</b> | <b>N or reads</b> | <b>mean coverage depth</b> | <b>Fraction of bp covered 30x or more</b> |
|--------------|-------------------|----------------------------|-------------------------------------------|
| S04          | 61,765,564        | 77                         | 0.87                                      |
| S03          | 55,798,415        | 68                         | 0.84                                      |
| S02          | 62,527,226        | 76                         | 0.87                                      |
| S01          | 55,522,186        | 68                         | 0.84                                      |
| R19          | 53,519,149        | 65                         | 0.82                                      |
| R18          | 58,506,345        | 68                         | 0.85                                      |
| R17          | 58,542,227        | 71                         | 0.86                                      |
| R16          | 55,582,965        | 68                         | 0.84                                      |
| R15          | 61,704,790        | 76                         | 0.88                                      |
| R14          | 65,845,085        | 81                         | 0.89                                      |
| R07          | 62,365,357        | 77                         | 0.88                                      |
| R06          | 66,855,134        | 80                         | 0.89                                      |

Supplementary Table 5: Summary statistics of the single cell RNA sequencing

| Sample     | N drug free doublings* | scRNAseq batch ID | Estimated Number of Cells | Mean Reads per Cell | Median Genes per Cell | Number of Reads | Valid Barcodes | Reads Mapped Confidently to Transcriptome | Reads Mapped Confidently to Exonic Regions | Reads Mapped Confidently to Intronic Regions | Reads Mapped Confidently to Intergenic Regions | Sequencing Saturation | Q30 Bases in Barcode | Q30 Bases in RNA Read | Q30 Bases in UMI | Fraction Reads in Cells | Total Genes Detected |
|------------|------------------------|-------------------|---------------------------|---------------------|-----------------------|-----------------|----------------|-------------------------------------------|--------------------------------------------|----------------------------------------------|------------------------------------------------|-----------------------|----------------------|-----------------------|------------------|-------------------------|----------------------|
| CAOV3      | NA                     | 1                 | 2258                      | 51783               | 4141                  | 116927569       | 98.60%         | 67.20%                                    | 72.00%                                     | 8.20%                                        | 2.50%                                          | 17.00%                | 96.30%               | 67.30%                | 96.20%           | 85.20%                  | 19183                |
| Parent     | NA                     | 1                 | 2001                      | 57138               | 4236                  | 114333459       | 98.60%         | 65.50%                                    | 70.40%                                     | 8.10%                                        | 2.50%                                          | 17.30%                | 96.30%               | 68.70%                | 96.20%           | 84.70%                  | 19258                |
| S02        | NA                     | 1                 | 2089                      | 44561               | 3926                  | 93089101        | 98.50%         | 63.00%                                    | 67.90%                                     | 8.40%                                        | 2.60%                                          | 12.00%                | 96.20%               | 63.50%                | 96.20%           | 87.40%                  | 19682                |
| S03        | NA                     | 1                 | 1495                      | 69191               | 4786                  | 103441435       | 98.60%         | 64.10%                                    | 68.90%                                     | 8.40%                                        | 2.50%                                          | 17.30%                | 96.30%               | 64.20%                | 96.20%           | 86.30%                  | 19282                |
| R06 step15 | 38                     | 1                 | 2187                      | 43897               | 4235                  | 96003442        | 98.50%         | 67.30%                                    | 71.80%                                     | 9.10%                                        | 2.60%                                          | 18.00%                | 96.30%               | 66.80%                | 96.20%           | 81.20%                  | 19604                |
| R06 step5  | 24                     | 2                 | 2389                      | 53484               | 4033                  | 127773590       | 98.60%         | 68.60%                                    | 73.00%                                     | 9.10%                                        | 3.00%                                          | 28.30%                | 97.60%               | 68.90%                | 97.50%           | 94.10%                  | 20118                |
| R14 step15 | 77                     | 1                 | 2836                      | 32814               | 3540                  | 93063041        | 98.50%         | 64.30%                                    | 69.40%                                     | 7.90%                                        | 2.50%                                          | 12.60%                | 96.20%               | 62.90%                | 96.20%           | 84.40%                  | 19657                |
| R14 step5  | 25                     | 2                 | 2533                      | 62998               | 3795                  | 134244840       | 98.60%         | 66.40%                                    | 71.10%                                     | 9.60%                                        | 3.30%                                          | 27.90%                | 97.60%               | 68.30%                | 97.50%           | 93.50%                  | 20558                |
| R16 step15 | 67                     | 2                 | 1931                      | 17461               | 2451                  | 33717516        | 98.60%         | 62.30%                                    | 66.40%                                     | 8.90%                                        | 3.00%                                          | 8.20%                 | 95.60%               | 58.40%                | 95.30%           | 89.60%                  | 18307                |
| R16 step5  | 14                     | 2                 | 2364                      | 48123               | 3670                  | 113765069       | 98.60%         | 66.70%                                    | 71.40%                                     | 9.00%                                        | 3.10%                                          | 26.50%                | 97.60%               | 67.10%                | 97.50%           | 90.10%                  | 20204                |
| R18 step15 | 66                     | 2                 | 2731                      | 10534               | 1804                  | 28768375        | 98.60%         | 61.30%                                    | 65.50%                                     | 9.30%                                        | 2.90%                                          | 6.30%                 | 95.50%               | 55.40%                | 95.20%           | 89.60%                  | 17843                |
| R18 step5  | 14                     | 2                 | 2101                      | 58392               | 4039                  | 122681684       | 98.60%         | 66.40%                                    | 71.20%                                     | 9.20%                                        | 3.10%                                          | 28.40%                | 97.60%               | 66.80%                | 97.50%           | 92.50%                  | 20976                |

\* R clones were still considered stably resistant at the studied stage, supported by Figure S1 (Step 15) or Stordal et al (Step 5).

Reference: Stordal, B., Peters, G. & Davey, R. Similar chromosomal changes in cisplatin and oxaliplatin-resistant sublines of the H69 SCLC cell line are not associated with platinum resistance. Genes. Chromosomes Cancer 45, 1094–1105 (2006)
